# Supplementary material for: Mitomycin C-treated human-induced pluripotent stem cells as a safe delivery system of gold nanorods for targeted photothermal therapy of gastric cancer
Source: Royal Society of Chemistry journal article supplement (doi:10.1039/c6nr06851k), 2016-11-17
Supplement: c6nr06851k1.pdf [file c6nr06851k1.pdf]

## Mitomycin C treated human induced pluripotent stem cells as a safe delivery system of gold nanorods for targeted photothermal therapy of gastric cancer

Meng Yang<sup>a,b</sup>, Yanlei Liu<sup>a,b</sup>, Wenxiu Hou<sup>a,b</sup>, Xiao Zhi<sup>a</sup>, Chunlei Zhang<sup>a</sup>, Fei Pan<sup>a</sup>, Yuming Yang<sup>a</sup>, Jian Ni<sup>a</sup>, Daxiang Cui<sup>a,b\*</sup>

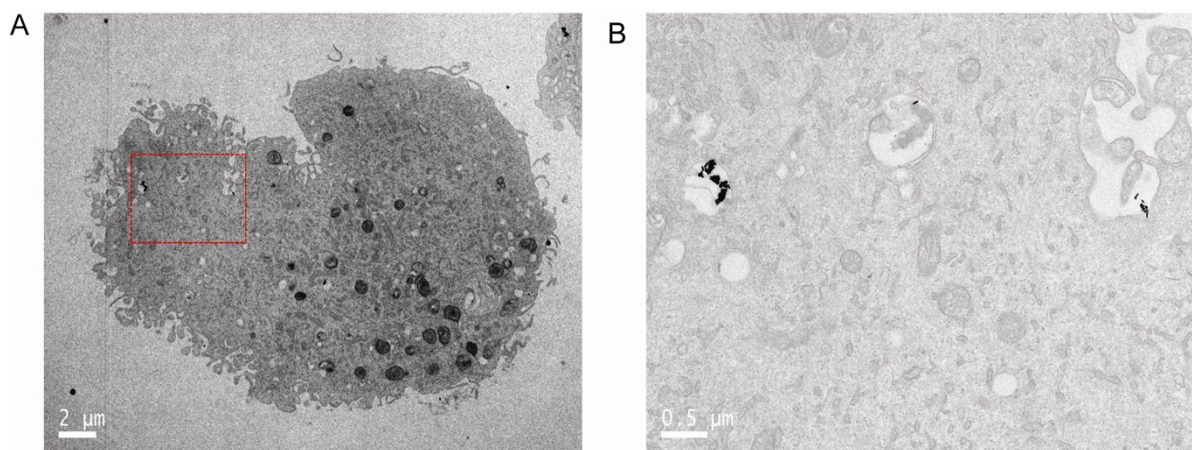

Figure S1. Representative TEM images of AuNRs in iPS cells. (B) is the high magnification of red dotted rectangle in (A).
